# Supplementary material
Source: publisher figshare collection journal article supplement (https://acs.figshare.com/ndownloader/files/4348471)
Supplement: Supplementary file 1 [file 4348471]

## **Supporting Information**

### **Epimeric Monosaccharide-Quinone Hybrids on Gold Electrode toward the Electrochemical Probing of Specific Carbohydrate-Protein Recognitions**

**Xiao-Peng He,<sup>†,‡</sup> Xiu-Wen Wang,<sup>†</sup> Xiao-Ping Jin,<sup>†</sup> Hao Zhou,<sup>†</sup> Xiao-Xin Shi,<sup>‡</sup> Guo-Rong Chen<sup>†</sup> and Yi-Tao Long<sup>\*,†</sup>**

*Key Laboratory for Advanced Materials and Institute of Fine Chemicals, and School of Pharmacy, East China University of Science and Technology, 130 Meilong Road, Shanghai, P. R. China*

\* Corresponding author. Tel/Fax: +86-21-64252339. E-mail: [ytlong@ecust.edu.cn](mailto:ytlong@ecust.edu.cn).

<sup>†</sup> Key Laboratory for Advanced Materials.

<sup>‡</sup> School of Pharmacy.

#### **Contents list:**

1. Fig. S-1;
2. Fig. S-2;
3. <sup>1</sup>H NMR spectra of compound **1**, **2**, **4** and **5**;
4. <sup>13</sup>C NMR spectra of compound **1**, **4**, **5**;
5. HR-ESI-MS of spectrum of compound **2**

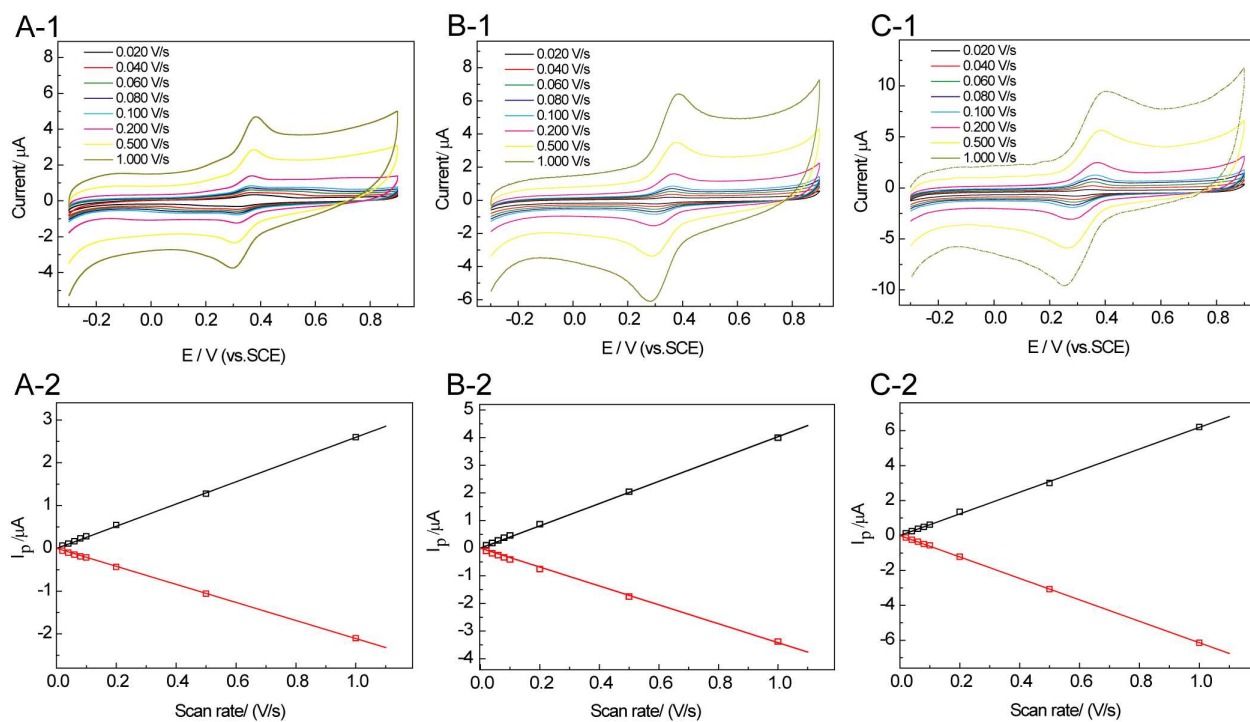

**Figure S-1.** The CVs were recorded in 0.1 M H<sub>2</sub>SO<sub>4</sub> at scan rates from 0.020 to 1.000 V/s as illustrated in A-1, B-1 and C-1. Peak currents of SAM **1**, **2** and **3** on gold electrodes,  $I_p$ , as a function of scan rate,  $v$  as illustrated in A-2, B-2 and C-2. All first scans were initiated in the positive direction from -0.3 V.

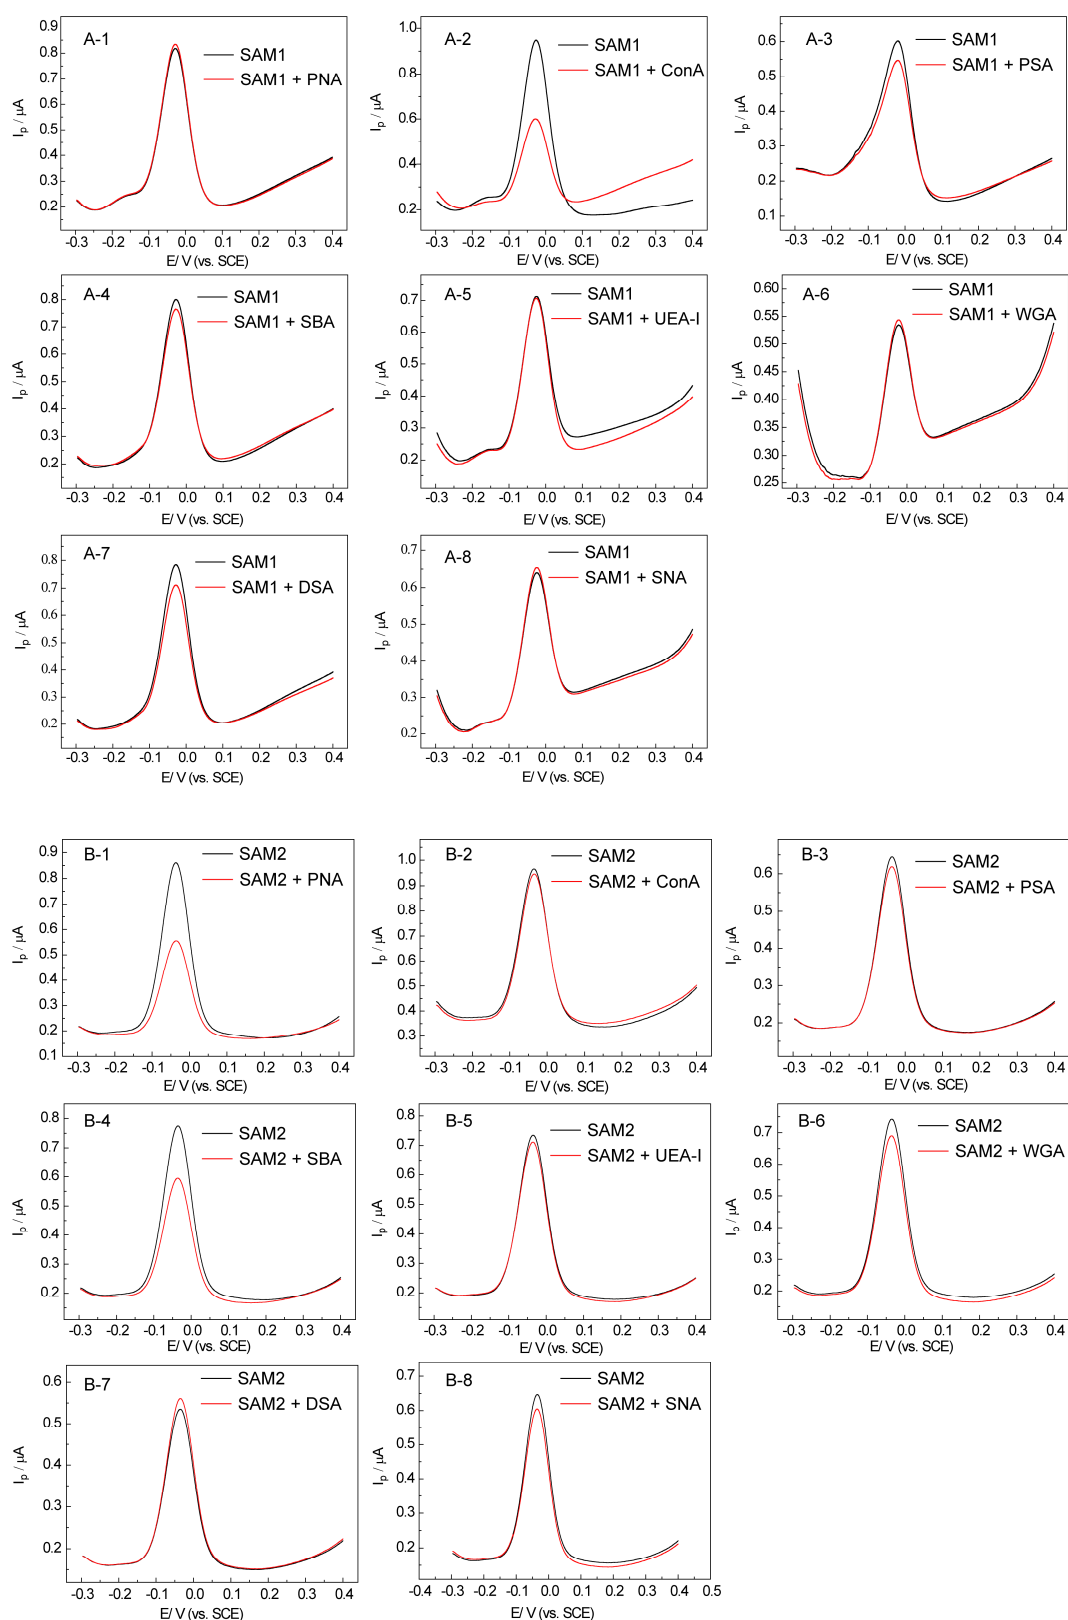

**Figure S-2.** DPV plots of (A) SAM 1 and (B) SAM 2 upon addition of 7  $\mu\text{M}$  of various specific and non-specific lectins.

<sup>1</sup>H NMR of compound 4 ( $\delta = 7.26$ , CDCl<sub>3</sub>):

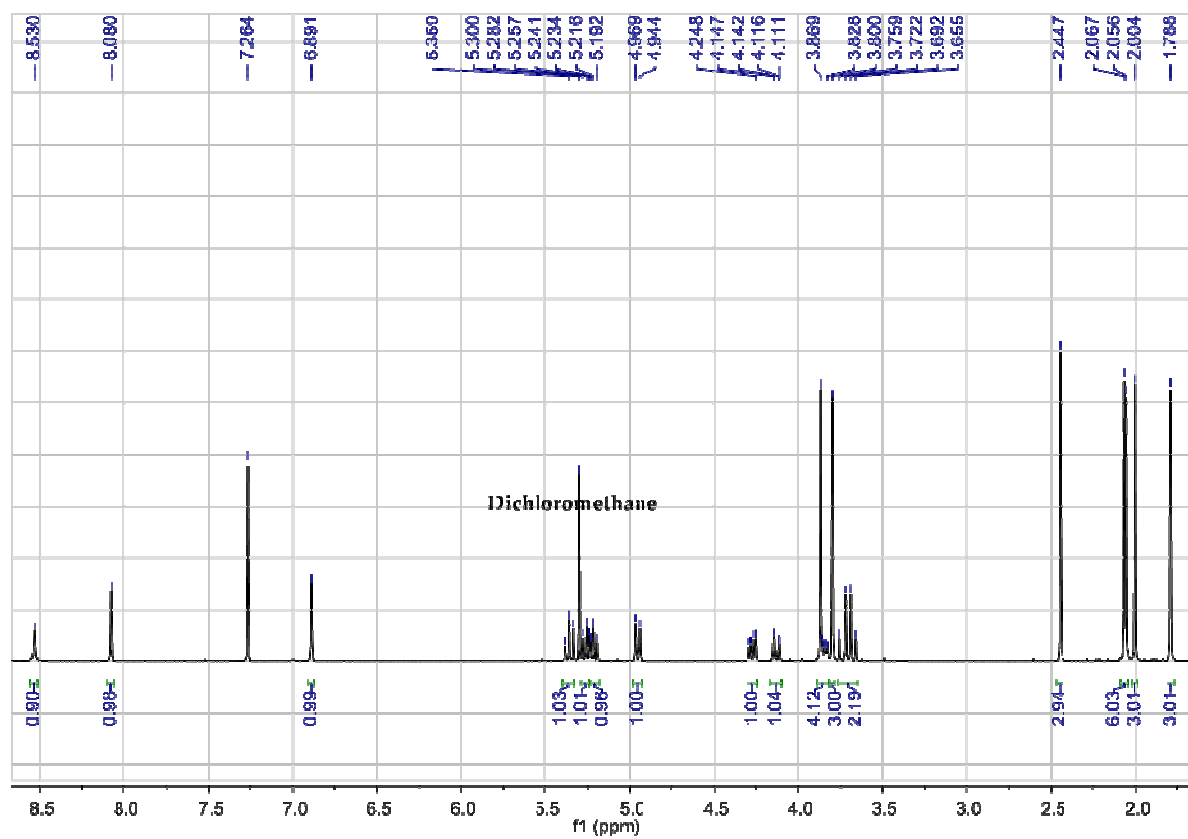

$^{13}\text{C}$  NMR of compound 4 ( $\delta = 77.4, 77.1, 76.8, \text{CDCl}_3$ ):

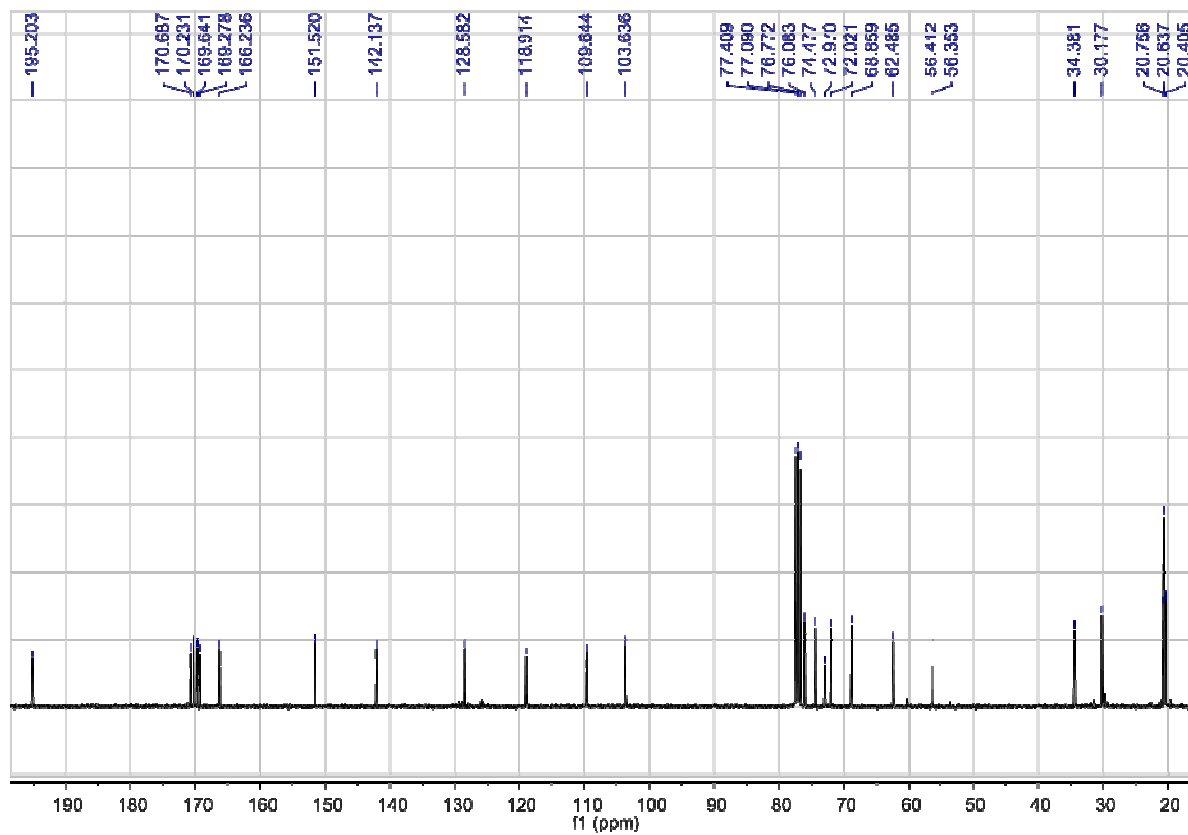

<sup>1</sup>H NMR of compound 5 ( $\delta = 7.26$ , CDCl<sub>3</sub>):

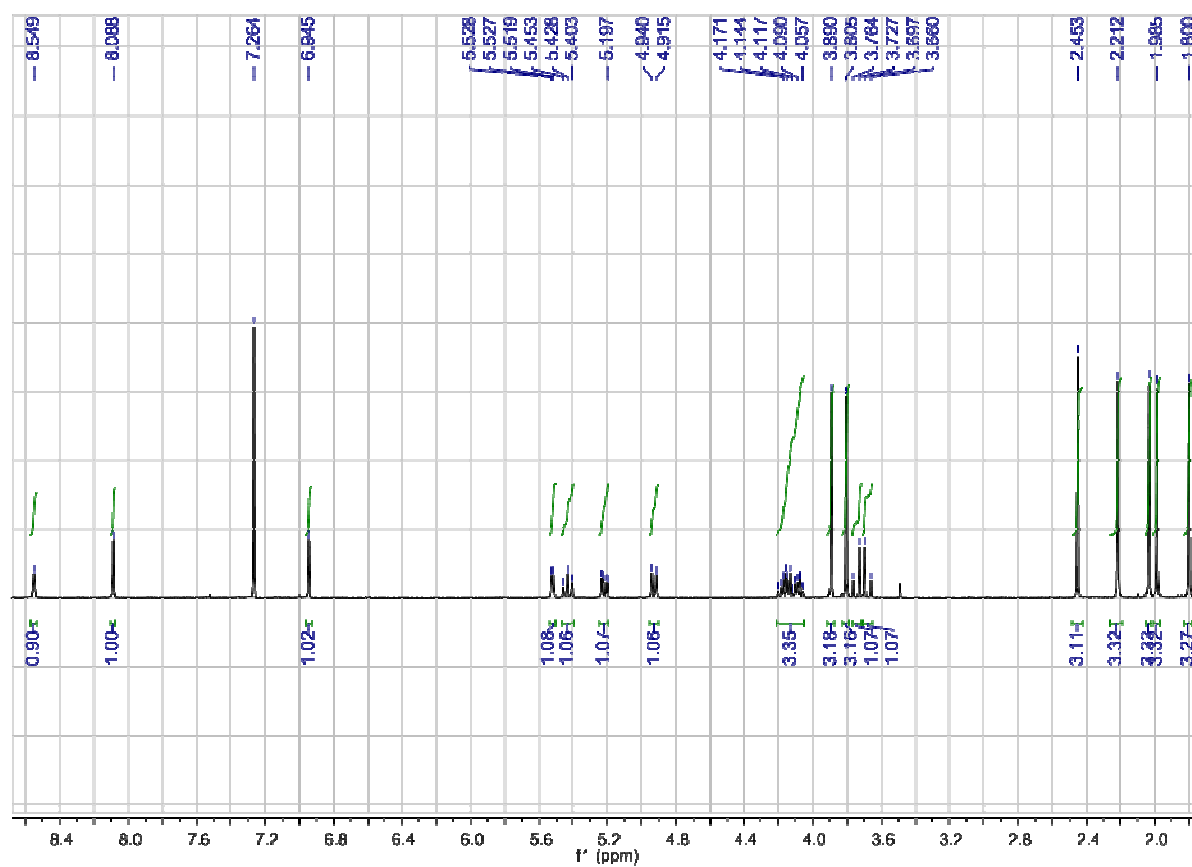

$^{13}\text{C}$  NMR of compound 5 ( $\delta = 77.5, 77.2, 76.9, \text{CDCl}_3$ ):

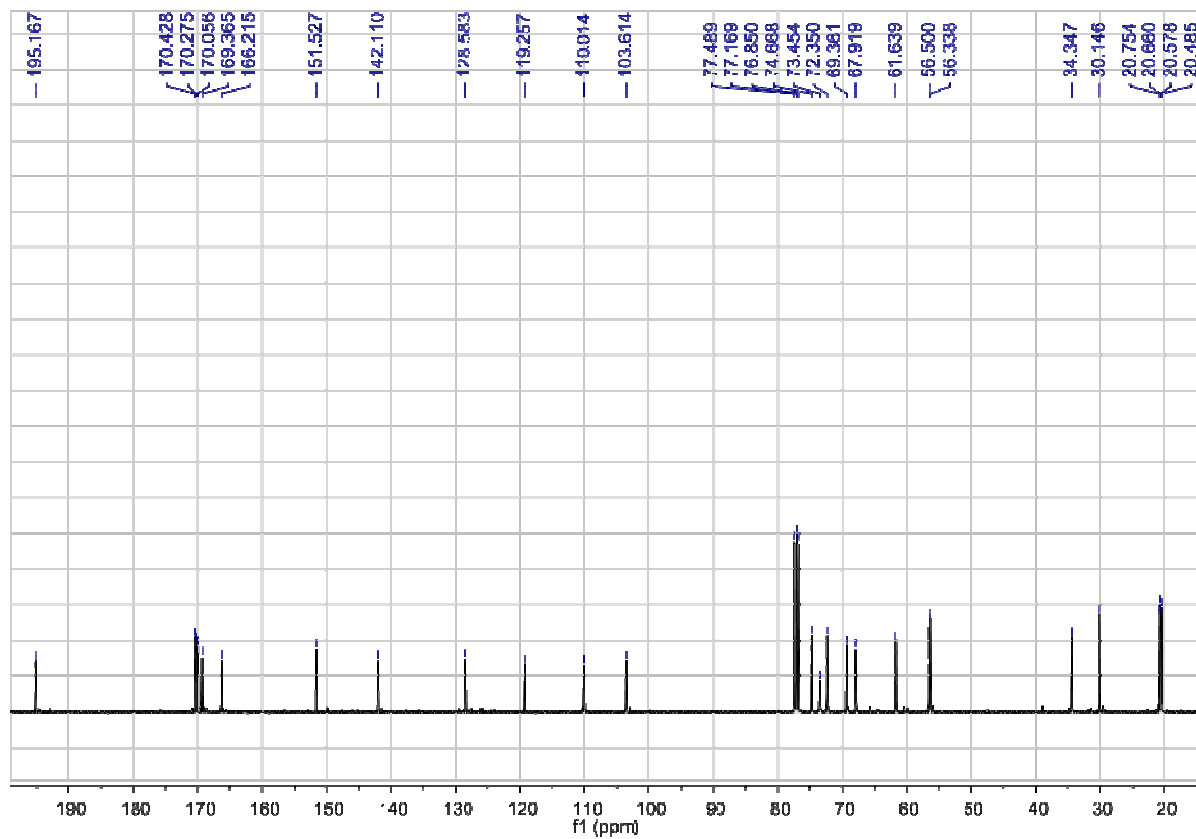

<sup>1</sup>H NMR of compound 1 ( $\delta = 4.70$ , D<sub>2</sub>O):

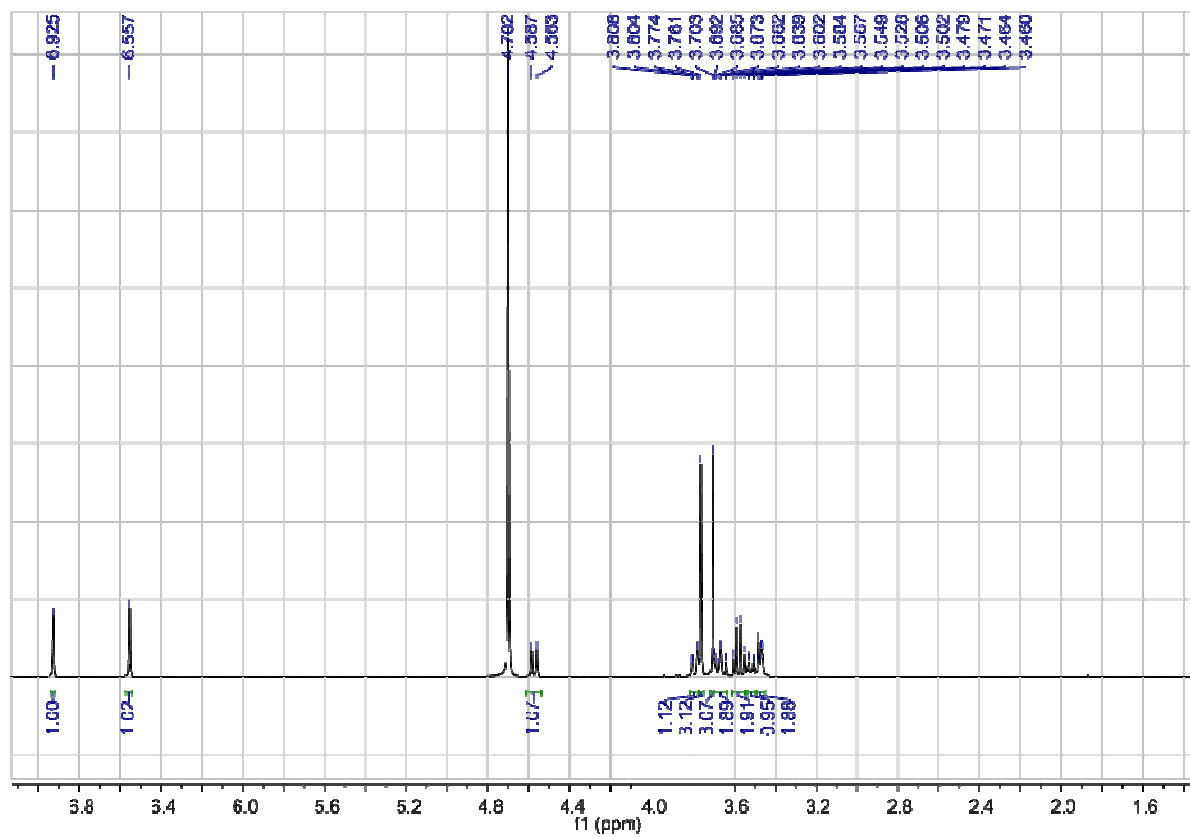



<sup>13</sup>C NMR of compound 1:

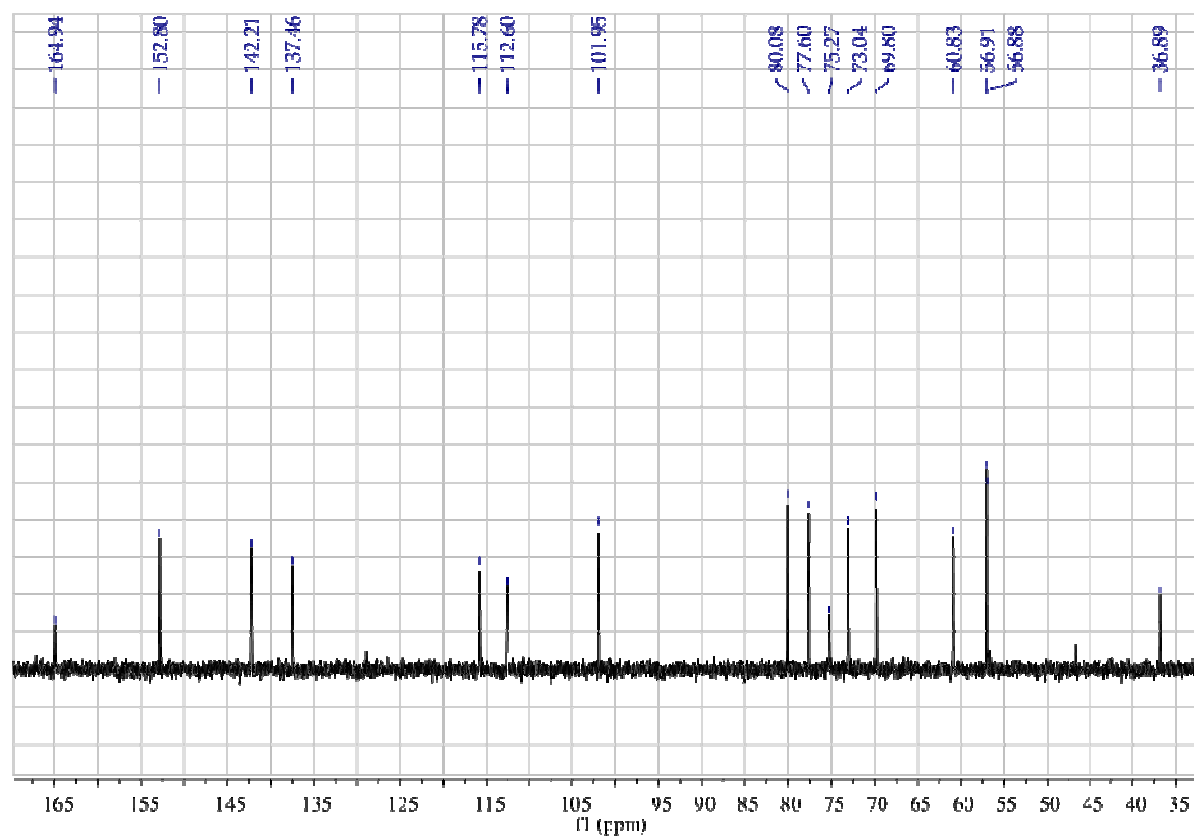

<sup>1</sup>H NMR of compound 2 ( $\delta = 4.70$ , D<sub>2</sub>O):

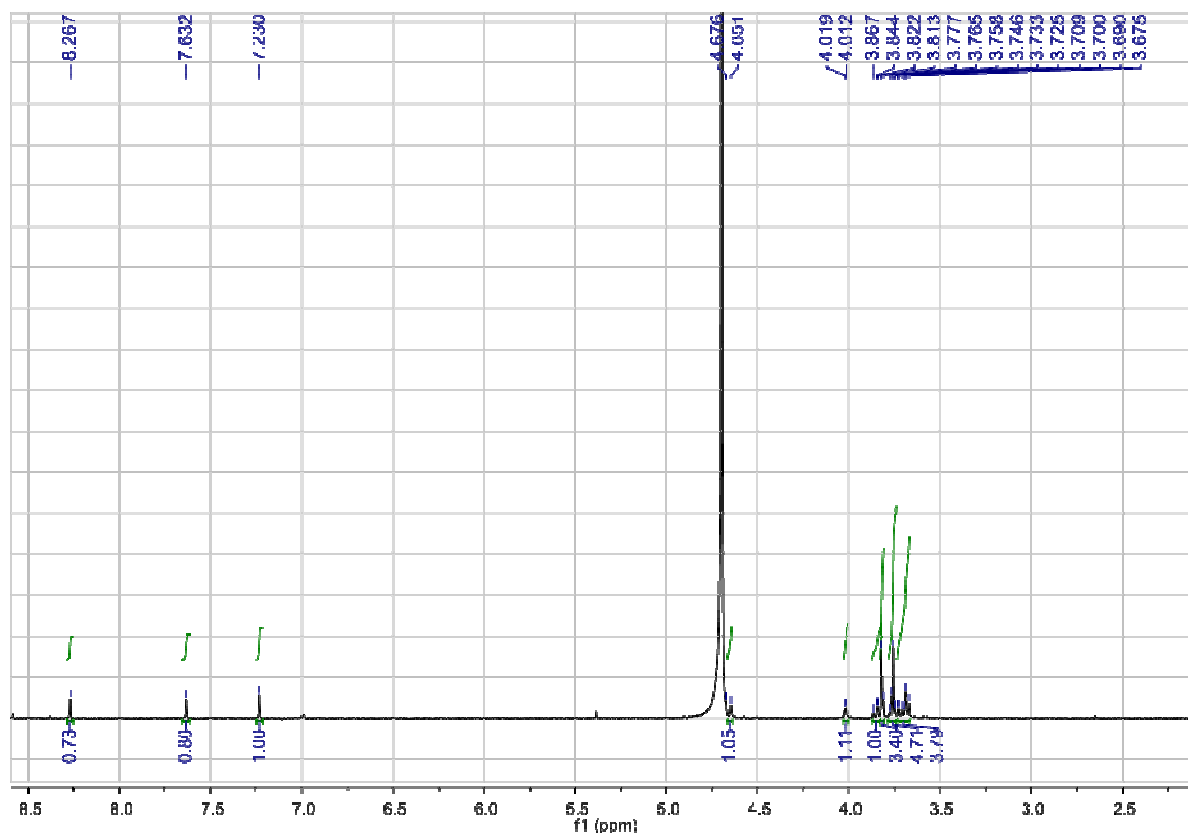

HR(ESI)MS of compound 2:

Elemental Composition Report

Single Mass Analysis

Tolerance = 3.0 mDa / DBE: min = -1.5, max = 150.0  
Element prediction: Off  
Number of isotope peaks used for i-FIT = 2

Monoisotopic Mass, Even Electron Ions  
180 formula(e) evaluated with 1 results within limits (all results (up to 1000) for each mass)  
Elements Used:  
C: 1-18 H: 0-25 N: 1-3 O: 0-8 S: 0-4  
LONG-YT  
LYT-JXP05 58 (1.884) Cm (57.61)

2: TOF MS ES-  
9.59e+002

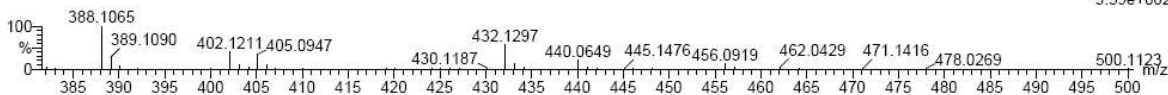

Minimum: -1.5  
Maximum: 3.0 5.0 150.0

| Mass     | Calc. Mass | mDa  | PPM  | DBE | i-FIT | i-FIT (Norm) | Formula        |
|----------|------------|------|------|-----|-------|--------------|----------------|
| 388.1065 | 388.1066   | -0.1 | -0.3 | 6.5 | 9.7   | 0.0          | C16 H22 N O8 S |
